# Supplementary material
Source: PubMed Central journal article supplement (PMC5985029)
Supplement: mmc3.pdf [file mmc3.pdf]

### ***ImageJ Macro for image processing***

```
setBatchMode(true);
run("8-bit");
run("Crop");
StackID="Image Stack File Name";
for (i=0; i<NSlices; i+=NSlices to Median)
{
j=i+ NSlices to Median;
selectImage (StackID);
Number = i/ NSlices to Median;
run("Z Project...", "start=i stop=j projection=Median");
run("Subtract Background...", "rolling=50 light slice");
run("Invert", "slice");
saveAs("PNG", "File Location"+ "Title" + Number);
close();}
run("Image Sequence...", "open=[File Location + Title] sort");
StackID="Folder Name";
for (i=0; i<NSlices; i+=NSlices to Sum)
{
j=i+ NSlices to Sum;
selectImage (StackID);
Number = i/NSlices to Sum;
run("Z Project...", "start=i stop=j projection=[Sum Slices]");
saveAs("PNG", "File Location"+ "Title" + Number);
close();}
```
